# Supplementary material
Source: MDPI journal article supplement (https://www.mdpi.com/2071-1050/11/6/1811)
Supplement: s1 [file s1]

Supplementary Materials

**Study 1**

Hashtags used to elicit tweets:

#ModiInAmerica

#Modi

#NarendraModi

#PMOIndia

#narendramodi

#CleanIndia

#CleanIndiaCampaign

#MyCleanIndia

#SwachhBharatMission

#SwachBharatMission

#CleanUpIndia

#SwachBharat

#SwachBharat

#SwachhBharat

## PURITY NORMS AND ENVIRONMENTAL BEHAVIOR

### Coding Instructions for independent coders:

In the next several pages, you will see several words. For each word, please assess how likely it is that the word can be used to describe an action or behavior.

### Word list for coding (each word shown on new page):

|             |           |              |
|-------------|-----------|--------------|
| broom       | along     | add          |
| challenge   | area      | appreciate   |
| cleanliness | around    | broom        |
| deserve     | branch    | congratulate |
| drive       | broom     | create       |
| fake        | dirtiness | effort       |
| fight       | ganga     | gesture      |
| ghat        | garbage   | great        |
| help        | keep      | himself      |
| initiate    | litter    | inspire      |
| involve     | mumbai    | join         |
| join        | pick      | kudo         |
| launch      | place     | sever        |
| liar        | public    | significant  |
| nominate    | road      | strength     |
| part        | start     | sure         |
| participate | street    | together     |
| register    | surround  | toward       |
| varanasi    | sweep     | wonder       |
| voter       | up        | won't        |

## PURITY NORMS AND ENVIRONMENTAL BEHAVIOR

### Probabilities of Clean India related keywords across the 100 topics:

In order to assess the overall probability that a topic was about the campaign we summed up the probabilities of Clean India Related keywords in each topic. These keywords only occurred in 8 (out of 100) of the topics:

\*Topic 7: 0.193

\*Topic 20: 0.417

Topic 39: 0.008

Topic: 40: 0.001

Topic 52: 0.001

\*Topic 67: 0.333

Topic 86: 0.037

\*Topics that were used in subsequent analyses

### Reliability Analysis for 3 Clean India Related Topics:

Topic 7: Cronbach's  $\alpha = .90$

Topic 20: Cronbach's  $\alpha = .78$

Topic 67: Cronbach's  $\alpha = .91$

## PURITY NORMS AND ENVIRONMENTAL BEHAVIOR

### Study 2—Text Validation

Twenty-six participants were recruited via Amazon's Mechanical Turk online crowdsourcing platform.

All participants were adults living in India.

They received the following instructions:

In this task, you will be asked to read through two texts, asking you to take environmental action. For each text, we would like you to answer two questions:

- 1) To what degree the text reminds you about **purity and cleanliness**
- 2) To what degree the text reminds you about **nature and all living beings**

#### Text 1

"2nd October is the birth anniversary of our Puja Mahatma Gandhi and Lal Bahadur Shastri ji. Lal Bahadur Shastri gave us the Mantra of Jai Jawan Jai Kisan. Indian Farmers filled the granaries in reply to that exhortation. Puja Bapu gave us the message of 'Quit India- Clean India'. Our countrymen, under the leadership of Mahatma Gandhi, freed the nation from colonialism. Bapu's dream of cleanliness, however, remains unfulfilled.

I invite every one of you. We are going to take an oath here. My request is that you should raise both of your hands and remember Mahatma Gandhi. Feel that this work is for building a Bharat of the dreams of Puja Bapu. We should not just utter the words but take solemn pledge. You will take the pledge, take the movement forward and will leave no stone unturned. Mahatma Gandhi dreamt of an India which was not only free but also clean and developed. Mahatma Gandhi secured freedom for Mother India. Now it is our duty to serve Mother India by keeping the country neat and clean."

Please respond to the questions below

## PURITY NORMS AND ENVIRONMENTAL BEHAVIOR

|                                                                         | Strongly<br>disagree  | Disagree              | Somewhat<br>disagree  | Neither<br>agree<br>nor<br>disagree | Somewhat<br>agree     | Agree                 | Strongly<br>agree     |
|-------------------------------------------------------------------------|-----------------------|-----------------------|-----------------------|-------------------------------------|-----------------------|-----------------------|-----------------------|
| This text<br>makes me<br>think of<br>purity and<br>cleanliness          | <input type="radio"/> | <input type="radio"/> | <input type="radio"/> | <input type="radio"/>               | <input type="radio"/> | <input type="radio"/> | <input type="radio"/> |
| This text<br>makes me<br>think of<br>nature and<br>all living<br>beings | <input type="radio"/> | <input type="radio"/> | <input type="radio"/> | <input type="radio"/>               | <input type="radio"/> | <input type="radio"/> | <input type="radio"/> |

### Text 2

"We as human beings are very much dependent on others in nature. For example, we depend on the trees; we depend on the ants, the mice and the birds. Without birds the forests will not survive, because the birds whelp in transporting seeds. Without snakes the mice will feed on everything. Without frogs the bugs will thrive. Without forests there will be no rains. Without rains we will all die. There is really no end to our dependency on each other.

## PURITY NORMS AND ENVIRONMENTAL BEHAVIOR

Eventually, once we get rid of our delusions and make progress towards learning about our environment, we then realize that we do not the masters in running the show. Everything in the universe runs the show- the animal, the wind, the trees, etc. Therefore, there is a lesson for all of us in this: we must respect not only each other but also everyone and everything in this world. This country is going to be run by your initiatives and by your helping each other. We have to help our neighbors and clean our environments."

Please respond to the questions below

|                                                                         | Strongly<br>disagree  | Disagree              | Somewhat<br>disagree  | Neither<br>agree<br>nor<br>disagree | Somewhat<br>agree     | Agree                 | Strongly<br>agree     |
|-------------------------------------------------------------------------|-----------------------|-----------------------|-----------------------|-------------------------------------|-----------------------|-----------------------|-----------------------|
| This text<br>makes me<br>think of<br>purity and<br>cleanliness          | <input type="radio"/> | <input type="radio"/> | <input type="radio"/> | <input type="radio"/>               | <input type="radio"/> | <input type="radio"/> | <input type="radio"/> |
| This text<br>makes me<br>think of<br>nature and<br>all living<br>beings | <input type="radio"/> | <input type="radio"/> | <input type="radio"/> | <input type="radio"/>               | <input type="radio"/> | <input type="radio"/> | <input type="radio"/> |

## PURITY NORMS AND ENVIRONMENTAL BEHAVIOR

### Results

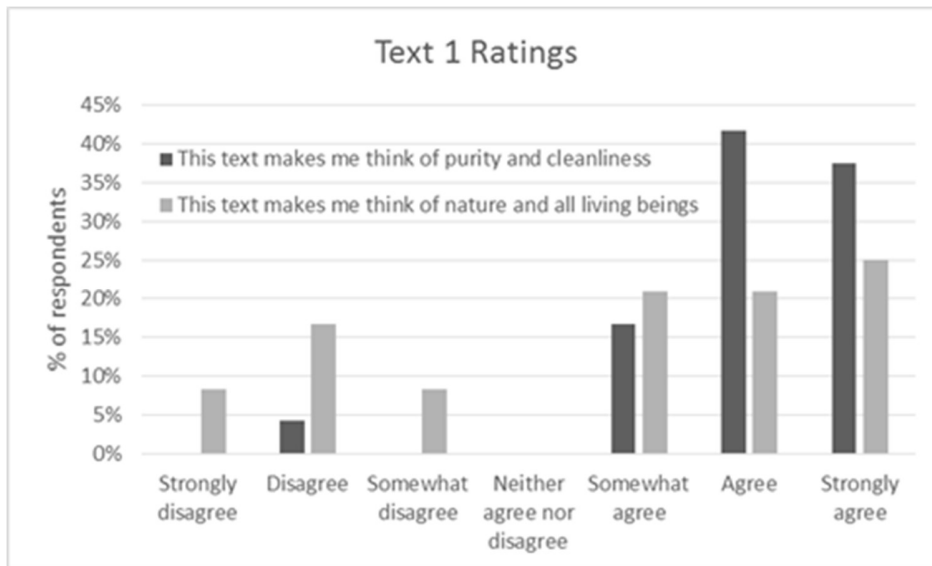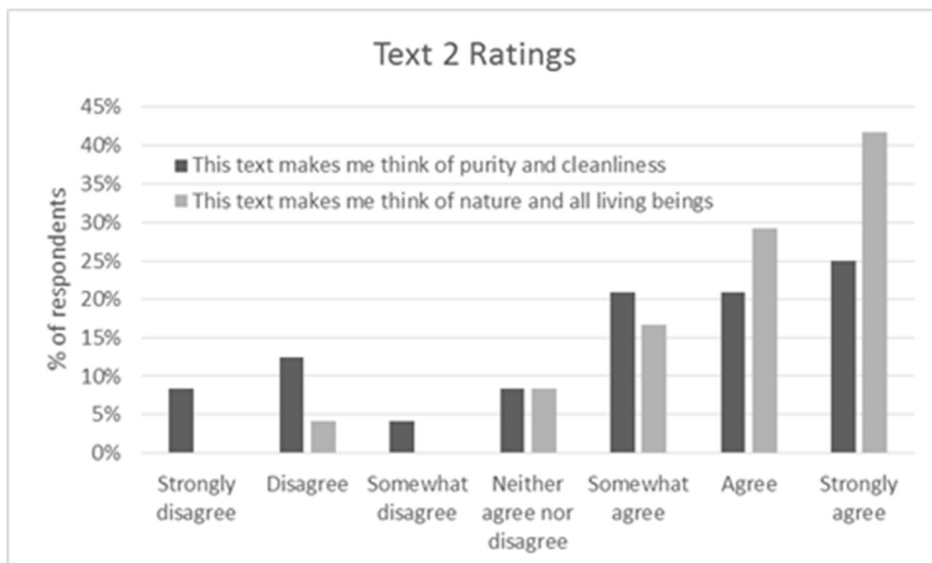

## PURITY NORMS AND ENVIRONMENTAL BEHAVIOR

### Study 2—Complete list of green behaviors

- \_\_\_1. Switch off the lights when they are not in use.
- \_\_\_2. Eat vegetarian meals more often
- \_\_\_3. Wash only full loads of laundry
- \_\_\_4. Install low flow shower heads
- \_\_\_5. Make recycling a priority
- \_\_\_6. Get around without a car (carpool, walk, bus)
- \_\_\_7. Vote for officials who make climate change a priority

### Study 3—Behavioral Recall Measure

Please indicate how often you have done each of the following in the last few years (1 = Never, 2 = Rarely, 3 = Sometimes, 4 = Often, and 5 = Very often). If you didn't have the opportunity to engage in the action please select NA.

- \_\_\_1. Switch off the lights when they are not in use.
- \_\_\_2. Eat vegetarian meals more often
- \_\_\_3. Wash only full loads of laundry
- \_\_\_4. Install low flow shower heads
- \_\_\_5. Make recycling a priority
- \_\_\_6. Get around without a car (carpool, walk, bus)
- \_\_\_7. Vote for officials who make climate change a priority
- \_\_\_8. Looked for ways to reuse things
- \_\_\_9. Picked up litter that was not your own
- \_\_\_10. Recycled newspapers
